# Supplementary material
Source: Elsevier journal article supplement (https://www.sciencedirect.com/science/article/pii/S2173509314000130)
Supplement: mmc1 [file S2173509314000130:mmc1.pdf]

## Valoración y manejo del control glucémico en la visita del estudio

Valor de HbA1c en la visita del estudio

□□.□%

¿Que objetivo individual de HbA1c ha establecido para este paciente?

□□.□%

Si el paciente no ha alcanzado en general su objetivo de HbA1c, por qué cree que es así?  
(Marque todo lo que aplica)

- ☐ Fallo terapéutico o régimen actual de medicación antihiper glucemia
- ☐ Baja adherencia del paciente a la dieta y/o recomendaciones de ejercicio físico
- ☐ Baja adherencia del paciente a las recomendaciones de automonitorización de la glucosa en sangre
- ☐ Baja adherencia del paciente a las recomendaciones de tomar la medicación antihiper glucemia incluyendo insulina
- ☐ Resistencia/rechazo del paciente a intensificar su régimen de medicación (ya sea añadiendo otro agente o aumentando la dosis)
- ☐ Rechazo del medico a intensificar el régimen
  - ☐ Temor a hipoglucemia
  - ☐ Temor a causar una ganancia de peso adicional
  - ☐ Temor a causar efectos adversos indeseables incluyendo síntomas gastrointestinales o enema periférico
  - ☐ Temor a interacciones con otros medicamentos
  - ☐ Coste del tratamiento

Si el paciente no está su objetivo de HbA1c, cuál es la principal acción que tomará respecto a este paciente? (marque todo lo que aplique)

- ☐ Abordaje educacional (estilo de vida, dieta, adherencia a la medicación actual)
- ☐ Aumento de la actual dosis de medicación antihiper glucemia
- ☐ Añadir una nueva medicación antihiper glucemia

Si es así, el agente de elección es: \_\_\_\_\_ (seleccionar del listado)

- ☐ Iniciar terapia con insulina con ☐ o sin ☐ cambio en la medicación oral para diabetes anterior, si aplica
- ☐ Remitir paciente al especialista para consejo adicional
- ☐ Otras acciones
- ☐ Ninguna acción específica

**Episodios de Hipoglucemia:**

¿Cuántos episodios de hipoglucemia grave tuvo el paciente en los últimos 12 meses?

□□

“Grave” define un episodio sintomático que requiere asistencia externa debido a grave afectación de la consciencia o comportamiento y rápida recuperación tras la administración de glucosa o glucagón

¿Cuántos episodios de hipoglucemia (aparte de los graves) tuvo el paciente de media al mes?

Si este número es menor de 1, especifique número aproximado al año

De los cuales

se diagnosticaron sólo por síntomas (resueltos con ingesta de glucosa)

se diagnosticaron mediante medida de glucosa sólo (concentración de glucosa <3 mmol/L)

se diagnosticaron mediante medida de glucosa (concentración de glucosa <3 mmol/L) y síntomas
