# Supplementary material
Source: Elsevier journal article supplement (https://www.sciencedirect.com/science/article/pii/S2173509314000130)
Supplement: mmc3 [file S2173509314000130:mmc3.pdf]

## HFS-II-2005

I. Preocupación: A continuación, encontrará una lista de preocupaciones que a veces tienen las personas diabéticas sobre el nivel bajo de azúcar en la sangre y sus consecuencias. Marque con una X la casilla que mejor describa con qué frecuencia **durante los últimos 6 meses** se ha PREOCUPADO por cada una de las afirmaciones a causa del bajo nivel de azúcar en la sangre y sus consecuencias. **(Por favor, no se salte ninguna)**

|                                                                                                                                                                                       | Nunca                       | Pocas veces                 | A veces                     | A menudo                    | Casi siempre                |
|---------------------------------------------------------------------------------------------------------------------------------------------------------------------------------------|-----------------------------|-----------------------------|-----------------------------|-----------------------------|-----------------------------|
| 1. Debido a una posible bajada de azúcar en sangre, me ha preocupado no reconocer / no darme cuenta de que mi nivel de azúcar en la sangre era bajo.                                  | <input type="checkbox"/> _0 | <input type="checkbox"/> _1 | <input type="checkbox"/> _2 | <input type="checkbox"/> _3 | <input type="checkbox"/> _4 |
| 2. Debido a una posible bajada de azúcar en sangre, me ha preocupado no tener bebidas o alimentos azucarados (como zumo de fruta o caramelos) a mano para tratar la bajada de azúcar. | <input type="checkbox"/> _0 | <input type="checkbox"/> _1 | <input type="checkbox"/> _2 | <input type="checkbox"/> _3 | <input type="checkbox"/> _4 |
| 3. Debido a una posible bajada de azúcar en sangre, me ha preocupado desmayarme en público.                                                                                           | <input type="checkbox"/> _0 | <input type="checkbox"/> _1 | <input type="checkbox"/> _2 | <input type="checkbox"/> _3 | <input type="checkbox"/> _4 |
| 4. Debido a una posible bajada de azúcar en sangre, me ha preocupado sentirme avergonzado/a o avergonzar a mis amigos en lugares públicos.                                            | <input type="checkbox"/> _0 | <input type="checkbox"/> _1 | <input type="checkbox"/> _2 | <input type="checkbox"/> _3 | <input type="checkbox"/> _4 |
| 5. Me ha preocupado tener una bajada de azúcar estando solo/a.                                                                                                                        | <input type="checkbox"/> _0 | <input type="checkbox"/> _1 | <input type="checkbox"/> _2 | <input type="checkbox"/> _3 | <input type="checkbox"/> _4 |
| 6. Debido a una posible bajada de azúcar en sangre, me ha preocupado parecer tonto/a o borracho/a ante los demás.                                                                     | <input type="checkbox"/> _0 | <input type="checkbox"/> _1 | <input type="checkbox"/> _2 | <input type="checkbox"/> _3 | <input type="checkbox"/> _4 |
| 7. Debido a una posible bajada de azúcar en sangre, me ha preocupado perder el control.                                                                                               | <input type="checkbox"/> _0 | <input type="checkbox"/> _1 | <input type="checkbox"/> _2 | <input type="checkbox"/> _3 | <input type="checkbox"/> _4 |
| 8. Me ha preocupado no tener a nadie cerca que me ayudara en caso de tener una bajada de azúcar.                                                                                      | <input type="checkbox"/> _0 | <input type="checkbox"/> _1 | <input type="checkbox"/> _2 | <input type="checkbox"/> _3 | <input type="checkbox"/> _4 |
| 9. Me ha preocupado tener una bajada de azúcar mientras conducía.                                                                                                                     | <input type="checkbox"/> _0 | <input type="checkbox"/> _1 | <input type="checkbox"/> _2 | <input type="checkbox"/> _3 | <input type="checkbox"/> _4 |
| 10. Debido a una posible bajada de azúcar en sangre, me ha preocupado cometer un error o tener un accidente.                                                                          | <input type="checkbox"/> _0 | <input type="checkbox"/> _1 | <input type="checkbox"/> _2 | <input type="checkbox"/> _3 | <input type="checkbox"/> _4 |
| 11. Debido a una posible bajada de azúcar en sangre, me ha preocupado que me valorasen mal o que me criticasen.                                                                       | <input type="checkbox"/> _0 | <input type="checkbox"/> _1 | <input type="checkbox"/> _2 | <input type="checkbox"/> _3 | <input type="checkbox"/> _4 |
| 12. Debido a una posible bajada de azúcar en sangre,                                                                                                                                  | <input type="checkbox"/> _0 | <input type="checkbox"/> _1 | <input type="checkbox"/> _2 | <input type="checkbox"/> _3 | <input type="checkbox"/> _4 |

me ha preocupado tener dificultad para pensar con claridad cuando era responsable de otras personas.

13. Debido a una posible bajada de azúcar en sangre, me ha preocupado sentirme mareado/a o que iba a desmayarme.

☐<sub>0</sub> ☐<sub>1</sub> ☐<sub>2</sub> ☐<sub>3</sub> ☐<sub>4</sub>

14. Debido a una posible bajada de azúcar en sangre, me ha preocupado lesionarme accidentalmente a mí mismo/a o a los demás.

☐<sub>0</sub> ☐<sub>1</sub> ☐<sub>2</sub> ☐<sub>3</sub> ☐<sub>4</sub>

15. Debido a una posible bajada de azúcar en sangre, me ha preocupado lesionar o dañar de forma permanente mi salud o mi cuerpo.

☐<sub>0</sub> ☐<sub>1</sub> ☐<sub>2</sub> ☐<sub>3</sub> ☐<sub>4</sub>

16. Me ha preocupado que la bajada de azúcar en sangre interfiriera en las cosas importantes que estaba haciendo.

☐<sub>0</sub> ☐<sub>1</sub> ☐<sub>2</sub> ☐<sub>3</sub> ☐<sub>4</sub>

17. Me ha preocupado tener una bajada de azúcar mientras dormía.

☐<sub>0</sub> ☐<sub>1</sub> ☐<sub>2</sub> ☐<sub>3</sub> ☐<sub>4</sub>

18. Debido a una posible bajada de azúcar en sangre, me ha preocupado sentirme afectado/a emocionalmente y ser difícil de tratar.

☐<sub>0</sub> ☐<sub>1</sub> ☐<sub>2</sub> ☐<sub>3</sub> ☐<sub>4</sub>

**¡Gracias!**
